# Supplementary material for: The force loading rate drives cell mechanosensing through both reinforcement and cytoskeletal softening
Source: PubMed Central journal article supplement (PMC8270983; doi:10.1038/s41467-021-24383-3), 2021-07-09
Supplement: 41467_2021_24383_MOESM3_ESM.pdf [file 41467_2021_24383_MOESM3_ESM.pdf]

## **Description of Additional Supplementary Files**

File Name: Supplementary Movie 1

Description: Time lapse of cell transfected with LifeAct-GFP and plated on a polyacrylamide gel of 0.6 kPa in stiffness.

File Name: Supplementary Movie 2

Description: Time lapse of cell transfected with LifeAct-GFP and plated on fibronectin-coated glass.

File Name: Supplementary Software 1

Description: Codes employed for the computational clutch model, and to analyze AFM and optical tweezers data.
